# Supplementary material for: Measurement of Light absorbing particles in surface snow of central and western Himalayan glaciers: spatial variability, radiative impacts, and potential source regions
Source: Copernicus journal article supplement (doi:10.5194/acp-2021-935), 2021-12-10
Supplement: Supplementary file 1 [file acp-2021-935-supplement-version2.pdf]

# Measurement of light absorbing particles in surface snow of central and western Himalayan glaciers: spatial variability, radiative impacts, and potential source regions

Chaman Gul<sup>1,2,3,4</sup>, Shichang Kang<sup>1,4</sup>, P. S. Praveen<sup>2</sup>, Xiaokang Wu<sup>5</sup>, Cenlin He<sup>6</sup>, Yangyang Xu<sup>5</sup>, Inka Koch<sup>1</sup>, Sher Muhammad<sup>1</sup>, Rajesh Kumar<sup>6</sup>, Getachew Dubache<sup>3</sup>

<sup>1</sup>State Key Laboratory of Cryosphere Science, Northwest Institute of Eco-Environment and Resources, Chinese Academy of Sciences, Lanzhou 73000, China

<sup>2</sup>International Centre for Integrated Mountain Development (ICIMOD), G.P.O. Box 3226, Kathmandu, Nepal

<sup>3</sup>Reading Academy, Nanjing University of Information Sciences and Technology 219 Ningliu Road, Nanjing, Jiangsu, 210044 China.

<sup>4</sup>University of Chinese Academy of Sciences, Beijing, China

<sup>5</sup>Department of Atmospheric Sciences, Texas A&M University, College Station, TX 77843, USA

<sup>6</sup>Research Applications Laboratory, National Center for Atmospheric Research, Boulder, CO 80301, USA

Correspondence: Siva Praveen Puppala ([sivapraveen.puppala@icimod.org](mailto:sivapraveen.puppala@icimod.org)), Chaman Gul ([gulchamangul76@yahoo.com](mailto:gulchamangul76@yahoo.com))

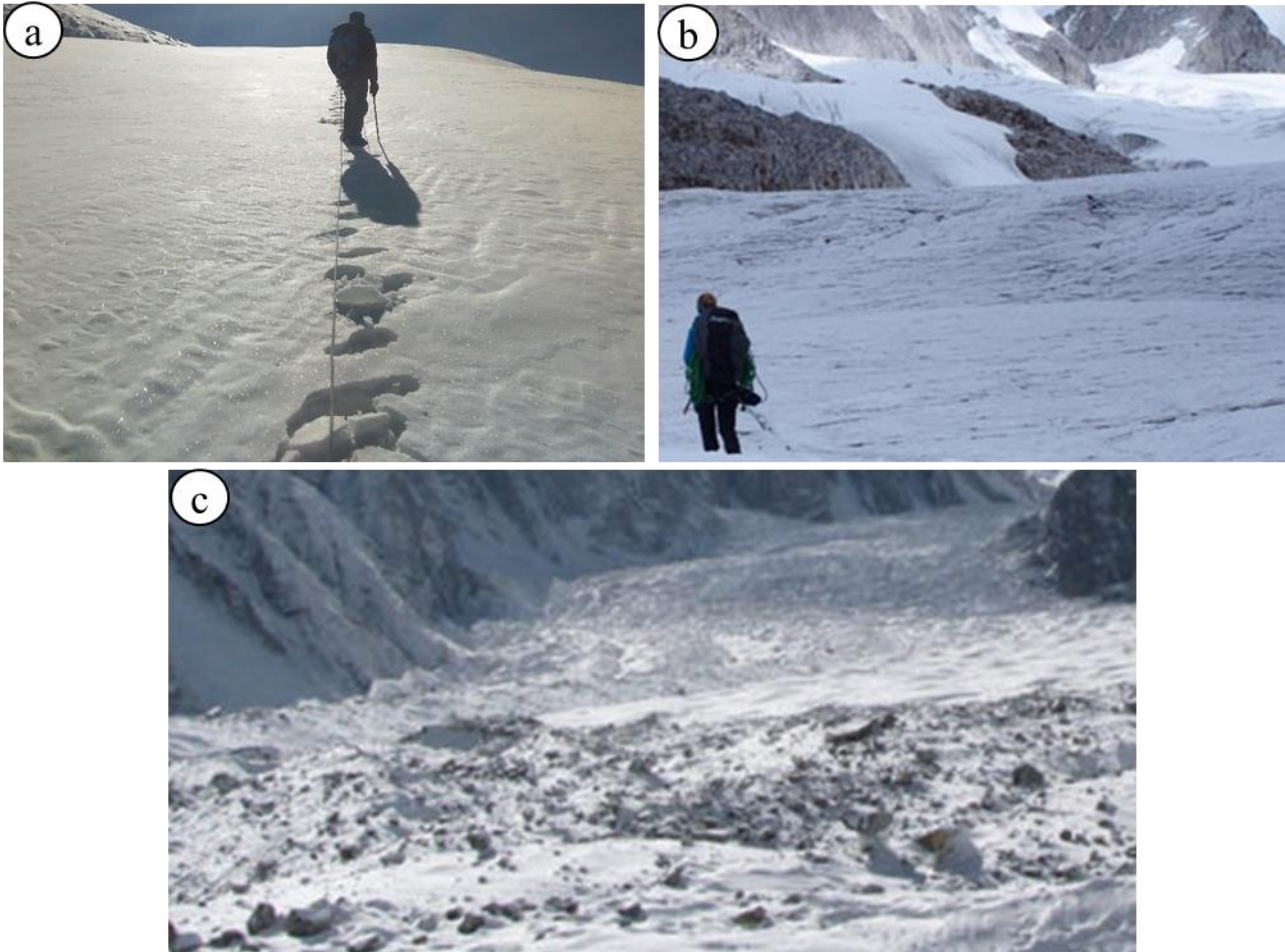

Figure S1. Surface condition of selected glaciers (a). Yala glacier in Nepal, (b). Thana glacier in Bhutan (c). Sachin glacier in Pakistan

**Table S1. Parameters used for sensitivity analysis with SNICAR model for selected glaciers snow samples under the input parameters of direct incident radiation and mid-latitude winter, clear-sky conditions.**

1 = solar zenith angle

2 = snow grain effective radius ( $\mu\text{m}$ )

3 = snowpack thickness (m)

4 = snowpack density ( $\text{kg m}^{-3}$ )

5 = albedo of underlying ground (a. visible, 0.3-0.7 $\mu\text{m}$ , b. near-infrared, 0.7-5.0 $\mu\text{m}$ )

6 = MAC scaling factor (experimental) for BC

7 = BC concentration (ppb, coated)

8 = dust concentration (ppm, 5.0–10.0  $\mu\text{m}$  diameter)

Volcanic ash concentration (ppm) and Experimental particle 1 concentration (ppb) were set to 0

| Site              | 1     | 2   | 3    | 4   | 5a   | 5b   | 6 | 7      | 8   |
|-------------------|-------|-----|------|-----|------|------|---|--------|-----|
| Yala (May-2016)   | 78.29 | 500 | 0.11 | 220 | 0.22 | 0.42 | 1 | 140.82 | 4.5 |
| Yala (May-2016)   | 65.27 | 500 | 0.11 | 220 | 0.22 | 0.42 | 1 | 140.82 | 4.5 |
| Yala (May-2016)   | 52.08 | 500 | 0.11 | 220 | 0.22 | 0.42 | 1 | 140.82 | 4.5 |
| Yala (May-2016)   | 38.92 | 500 | 0.11 | 220 | 0.22 | 0.42 | 1 | 140.82 | 4.5 |
| Yala (May-2016)   | 26.15 | 500 | 0.11 | 220 | 0.22 | 0.42 | 1 | 140.82 | 4.5 |
| Yala (May-2016)   | 15.19 | 500 | 0.11 | 220 | 0.22 | 0.42 | 1 | 140.82 | 4.5 |
| Yala (May-2016)   | 12.61 | 500 | 0.11 | 220 | 0.22 | 0.42 | 1 | 140.82 | 4.5 |
| Yala (May-2016)   | 21.68 | 500 | 0.11 | 220 | 0.22 | 0.42 | 1 | 140.82 | 4.5 |
| Yala (May-2016)   | 34.06 | 500 | 0.11 | 220 | 0.22 | 0.42 | 1 | 140.82 | 4.5 |
| Yala (May-2016)   | 47.13 | 500 | 0.11 | 220 | 0.22 | 0.42 | 1 | 140.82 | 4.5 |
| Yala (May-2016)   | 60.33 | 500 | 0.11 | 220 | 0.22 | 0.42 | 1 | 140.82 | 4.5 |
| Yala (May-2016)   | 73.42 | 500 | 0.11 | 220 | 0.22 | 0.42 | 1 | 140.82 | 4.5 |
| Yala (May-2016)   | 86.19 | 500 | 0.11 | 220 | 0.22 | 0.42 | 1 | 140.82 | 4.5 |
| Yala (Sept -2016) | 85.50 | 550 | 0.10 | 240 | 0.25 | 0.45 | 1 | 68.97  | 4.3 |
| Yala (Sept -2016) | 72.56 | 550 | 0.10 | 240 | 0.25 | 0.45 | 1 | 68.97  | 4.3 |
| Yala (Sept -2016) | 59.96 | 550 | 0.10 | 240 | 0.25 | 0.45 | 1 | 68.97  | 4.3 |
| Yala (Sept -2016) | 48.23 | 550 | 0.10 | 240 | 0.25 | 0.45 | 1 | 68.97  | 4.3 |
| Yala (Sept -2016) | 38.29 | 550 | 0.10 | 240 | 0.25 | 0.45 | 1 | 68.97  | 4.3 |
| Yala (Sept -2016) | 31.92 | 550 | 0.10 | 240 | 0.25 | 0.45 | 1 | 68.97  | 4.3 |
| Yala (Sept -2016) | 31.42 | 550 | 0.10 | 240 | 0.25 | 0.45 | 1 | 68.97  | 4.3 |
| Yala (Sept -2016) | 37.02 | 550 | 0.10 | 240 | 0.25 | 0.45 | 1 | 68.97  | 4.3 |

|                   |       |     |      |     |      |      |   |         |       |
|-------------------|-------|-----|------|-----|------|------|---|---------|-------|
| Yala (Sept -2016) | 46.57 | 550 | 0.10 | 240 | 0.25 | 0.45 | 1 | 68.97   | 4.3   |
| Yala (Sept -2016) | 58.10 | 550 | 0.10 | 240 | 0.25 | 0.45 | 1 | 68.97   | 4.3   |
| Yala (Sept -2016) | 70.62 | 550 | 0.10 | 240 | 0.25 | 0.45 | 1 | 68.97   | 4.3   |
| Yala (Sept -2016) | 83.55 | 550 | 0.10 | 240 | 0.25 | 0.45 | 1 | 68.97   | 4.3   |
| Thana (Sept-2016) | 86.84 | 550 | 0.10 | 240 | 0.25 | 0.45 | 1 | 39.39   | 34.63 |
| Thana (Sept-2016) | 73.76 | 550 | 0.10 | 240 | 0.25 | 0.45 | 1 | 39.39   | 34.63 |
| Thana (Sept-2016) | 60.73 | 550 | 0.10 | 240 | 0.25 | 0.45 | 1 | 39.39   | 34.63 |
| Thana (Sept-2016) | 48.18 | 550 | 0.10 | 240 | 0.25 | 0.45 | 1 | 39.39   | 34.63 |
| Thana (Sept-2016) | 36.79 | 550 | 0.10 | 240 | 0.25 | 0.45 | 1 | 39.39   | 34.63 |
| Thana (Sept-2016) | 28.12 | 550 | 0.10 | 240 | 0.25 | 0.45 | 1 | 39.39   | 34.63 |
| Thana (Sept-2016) | 25.23 | 550 | 0.10 | 240 | 0.25 | 0.45 | 1 | 39.39   | 34.63 |
| Thana (Sept-2016) | 29.87 | 550 | 0.10 | 240 | 0.25 | 0.45 | 1 | 39.39   | 34.63 |
| Thana (Sept-2016) | 39.45 | 550 | 0.10 | 240 | 0.25 | 0.45 | 1 | 39.39   | 34.63 |
| Thana (Sept-2016) | 51.23 | 550 | 0.10 | 240 | 0.25 | 0.45 | 1 | 39.39   | 34.63 |
| Thana (Sept-2016) | 63.94 | 550 | 0.10 | 240 | 0.25 | 0.45 | 1 | 39.39   | 34.63 |
| Thana (Sept-2016) | 77.04 | 550 | 0.10 | 240 | 0.25 | 0.45 | 1 | 39.39   | 34.63 |
| Thana (Sept-2016) | 89.90 | 550 | 0.10 | 240 | 0.25 | 0.45 | 1 | 39.39   | 34.63 |
| Sachin (May-2016) | 88.28 | 800 | 0.14 | 350 | 0.28 | 0.48 | 1 | 2381.38 | 100   |
| Sachin (May-2016) | 77.15 | 800 | 0.14 | 350 | 0.28 | 0.48 | 1 | 2381.38 | 100   |
| Sachin (May-2016) | 65.32 | 800 | 0.14 | 350 | 0.28 | 0.48 | 1 | 2381.38 | 100   |
| Sachin (May-2016) | 53.19 | 800 | 0.14 | 350 | 0.28 | 0.48 | 1 | 2381.38 | 100   |
| Sachin (May-2016) | 40.97 | 800 | 0.14 | 350 | 0.28 | 0.48 | 1 | 2381.38 | 100   |
| Sachin (May-2016) | 29.04 | 800 | 0.14 | 350 | 0.28 | 0.48 | 1 | 2381.38 | 100   |
| Sachin (May-2016) | 18.42 | 800 | 0.14 | 350 | 0.28 | 0.48 | 1 | 2381.38 | 100   |
| Sachin (May-2016) | 13.22 | 800 | 0.14 | 350 | 0.28 | 0.48 | 1 | 2381.38 | 100   |
| Sachin (May-2016) | 18.78 | 800 | 0.14 | 350 | 0.28 | 0.48 | 1 | 2381.38 | 100   |
| Sachin (May-2016) | 29.50 | 800 | 0.14 | 350 | 0.28 | 0.48 | 1 | 2381.38 | 100   |
| Sachin (May-2016) | 41.45 | 800 | 0.14 | 350 | 0.28 | 0.48 | 1 | 2381.38 | 100   |
| Sachin (May-2016) | 53.66 | 800 | 0.14 | 350 | 0.28 | 0.48 | 1 | 2381.38 | 100   |
| Sachin (May-2016) | 65.78 | 800 | 0.14 | 350 | 0.28 | 0.48 | 1 | 2381.38 | 100   |
| Sachin (May-2016) | 77.58 | 800 | 0.14 | 350 | 0.28 | 0.48 | 1 | 2381.38 | 100   |
| Sachin (May-2016) | 88.65 | 800 | 0.14 | 350 | 0.28 | 0.48 | 1 | 2530.00 | 100   |

**Table S2: Surface concentration of individual samples collected from various glaciers and mountain valleys during pre-monsoon, monsoon and winter seasons.**

| Elevation                             | EC ngg <sup>-1</sup> | OC ngg <sup>-1</sup> | Dust gg <sup>-1</sup> |
|---------------------------------------|----------------------|----------------------|-----------------------|
| Yala glacier summer (May 2016)        |                      |                      |                       |
| 4681                                  | 293.5586             | 761.6007             | 2.50                  |
| 4881                                  | 54.28432             | 136.006              | 1.50                  |
| 4882                                  | 85.91668             | 182.4214             | 9.50                  |
| 5061                                  | 130.04               | 276.2132             | 4.50                  |
| 5100                                  | 264.7962             | 572.4283             | 5.50                  |
| 5165                                  | 78.28648             | 223.995              | 3.50                  |
| 5200                                  | 2529.1               | 6708.673             | 196.50                |
| 5250                                  | 165.7292             | 354.2171             | 1.50                  |
| 5325                                  | 108.8889             | 256.0858             | 1.50                  |
| 5414                                  | 113.6366             | 232.1528             | 13.50                 |
| 5498                                  | 113.0902             | 238.7028             | 1.50                  |
| Sachin glacier summer (May 2016)      |                      |                      |                       |
| 3405                                  | 2455.31              | 4272.24              | 66.45                 |
| 3166                                  | 3274.945             | 4322.93              | 140.26                |
| 3340                                  | 2835.441             | 3665.21              | 102.63                |
| 3270                                  | 2874.646             | 4265.32              | 88.23                 |
| 3200                                  | 2910.211             | 4452.62              | 253.52                |
| 3600                                  | 3436.154             | 4660.83              | 95.23                 |
| 3480                                  | 3545.35              | 4832.36              | 78.46                 |
| 3690                                  | 1384.651             | 3627.78              | 117.59                |
| 3548                                  | 2136.429             | 4144.67              | 109.71                |
| 3800                                  | 835.324              | 1422.20              | 58.12                 |
| 3770                                  | 1232.753             | 3377.74              | 67.23                 |
| 3610                                  | 1655.456             | 3708.22              | 35.24                 |
| Yala autumn (September 2016)          |                      |                      |                       |
| 5168                                  | 23.17                | 82.35                | 1.50                  |
| 5176                                  | 64.30                | 162.80               | 12.00                 |
| 5211                                  | 54.79                | 132.31               | 1.50                  |
| 5288                                  | 39.65                | 103.16               | 2.50                  |
| 5332                                  | 162.97               | 406.89               | 4.00                  |
| Thana glacier autumn (September 2016) |                      |                      |                       |
| 5575                                  | 126.77               | 357.91               | 41.02                 |
| 5535                                  | 25.45                | 100.87               | 26.31                 |

|      |       |        |       |
|------|-------|--------|-------|
| 5474 | 32.97 | 106.43 | 34.53 |
| 5426 | 22.66 | 70.65  | 19.42 |
| 5380 | 30.27 | 83.27  | 24.14 |
| 5324 | 23.98 | 78.54  | 66.60 |
| 5276 | 28.06 | 103.32 | 60.91 |
| 5276 | 43.39 | 84.82  | 37.26 |
| 5204 | 21.00 | 57.55  | 1.500 |

---

**Table S3 BC and OC concentrations in glaciers from the Tibetan Plateau and its surroundings regions**

| Locations                   | Lat.    | Lon.     | Elevation | Sample type      | BC      | OC      | Method used                          | References             |
|-----------------------------|---------|----------|-----------|------------------|---------|---------|--------------------------------------|------------------------|
| <i>Yala glacier (May)</i>   | 28°14'N | 85°37'E  | 5300      | Surface snow     | 118.97  | 288.44  | Thermal-Optical, DIR 2005            | This study             |
| <i>Yala glacier(Sep)</i>    | 28°14'N | 85°37'E  | 5300      | Surface snow     | 68.98   | 177.50  | Thermal-Optical, DIR 2005            | This study             |
| <i>Thana glacier</i>        | 28°01'N | 90°36'E  | 5400      | Surface snow     | 39.39   | 115.93  | Thermal-Optical, DIR 2005            | This study             |
| <i>Sachin glacier (May)</i> | 35°20'N | 74°45'E  | 3200      | Surface snow     | 2381.39 | 3896.01 | Thermal-Optical, DIR 2005            | This study             |
| <i>Sachin glacier (Oct)</i> | 35°20'N | 74°45'E  | 3200      | Surface snow     | 3626.74 | 5449.70 | Thermal-Optical, DIR 2005            | This study             |
| <i>Tien Shan</i>            | 43.1° N | 86.82° E | 4130      | surface snow     | 400     | 1000    | Thermal-Optical, DIR 2001            | Xu et al., 2012        |
| <i>Tien Shan</i>            | 43.1° N | 86.82° E | 4130      | Bottom firn-pack | 3000    | 6500    | Thermal-Optical, DIR 2001            | Xu et al., 2012        |
| <i>Tien Shan</i>            | 43°06'N | 86.82° E | 3947      | fresh snow       | 16      |         | Thermal-Optical, DIR 2001            | Ming et al., 2016      |
| <i>Tien Shan</i>            | 43°06'N | 86.82° E | 3947      | aged snow        | 1507    |         | Thermal-Optical, DIR 2001            | Ming et al., 2016      |
| Miaoergou, Tien Shan        | 43.05°N | 94.32° E | 4510      | Snow pit         | 107     |         | Coulometric titration-based analysis | Ming et al., 2009      |
| Muji glacier                | 39.2°N  | 73.73° E | 5100      | no melt snow     | 25      | 58      | Thermal-Optical, DIR 2001            | Yang et al., 2015      |
| Muji glacier                | 39.2° N | 73.73° E | 5100      | melt snow        | 730     | 326     | Thermal-Optical, DIR 2001A           | Yang et al., 2015      |
| Laohugou glacier            | 39.17°N | 96.17° E | 4870      | fresh snow       | 849     |         | Thermal-Optical, DIR 2001A           | Li et al., 2016        |
| Laohugou glacier            | 39.17°N | 96.17° E | 4870      | superimposed ice | 24920   |         | Thermal-Optical, DIR 2001A           | Li et al., 2016        |
| Zhadang glacier             | 30.48°N | 90.65° E | 5651      | fresh snow       | 51.9    |         | Thermal-Optical, DIR 2001A           | Qu et al., 2014        |
| Zhadang glacier             | 30.48°N | 90.65° E | 5593      | superimposed ice | 404     |         | Thermal-Optical, DIR 2001A           | Qu et al., 2014        |
| East Rongbuk glacier,       | 28.04°N | 86.95° E | 6300      | snowpit          | 18      |         | Coulometric titration-based analysis | Ming et al., 2009      |
| East Rongbuk glacier,       | 28.03°N | 86.95° E | 6518      | ice core         | 1.5     |         | SP2                                  | Kaspari et al., 2011   |
| Mera glacier                | 27.71°N | 86.88° E | 5400      | snow/ice         | 180     |         | SP2                                  | Kaspari et al., 2014   |
| Mera glacier                | 27.72°N | 86.88° E | 6400      | snowpit          | 1       |         | SP2                                  | Kaspari et al., 2014   |
| PLZ4                        | 29.21°N | 96.92° E | 5500      | ice core         | 8       |         | Thermal-Optical, DIR 2001A           | Xu, Wang et al., 2009  |
| Zuoqiupu glacier,           | 29.20°N | 96.92° E | 5600      | ice core         | 5       | 20      | Thermal-Optical, DIR 2001            | Xu, Cao et al., 2009   |
| Northwest Greenland         | 77.92°N | 59.99° W | 1992      | surface snow     | 0.3     | 1.7     | Thermal-optical                      | Aoki et al., 2014      |
| Northwest Greenland         | 78.05°N | 67.63° W | 1490      | surface snow     | 2.3     | 8.1     | Thermal-optical                      | Aoki et al., 2014      |
| Holtedahlfonna,             | 79.14°N | 13.27° E | 1150      | ice core         | 45      |         | Thermal-optical                      | Ruppel et al., 2014    |
| Colle Gnifetti,             | 45.92°N | 7.87° E  | 4455      | ice core         | 20      |         | Elemental analysis                   | Thevernon et al., 2009 |
